# Supplementary material for: Investigation of Chemical Constituents of Eranthis longistipitata (Ranunculaceae): Coumarins and Furochromones
Source: MDPI journal article supplement (doi:10.3390/ijms23010406), 2021-12-30
Supplement: s1 [file s1]

## Supplementary Material

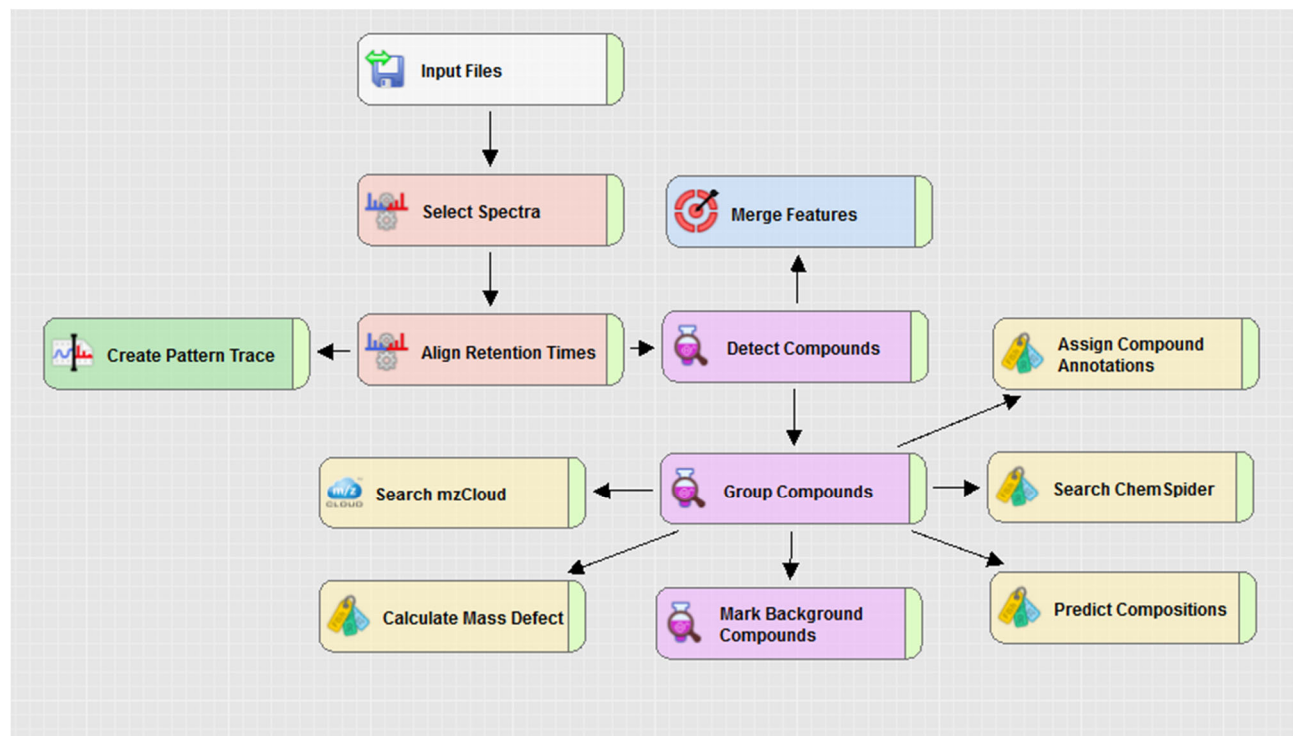

**Figure S1.** The workflow on Compound Discoverer used for the identification of chemical constituents
